# Supplementary material for: Inappropriate Intrusion of an Axonal Mitochondrial Anchor into Dendrites Causes Neurodegeneration
Source: PubMed Central journal article supplement — Cell Rep. Author manuscript; Available in PMC 2019 Nov 29. (PMC6884150; doi:10.1016/j.celrep.2019.09.012), 2019-10-15
Supplement: NIHMS1544204-supplement-1.pdf [file NIHMS1544204-supplement-1.pdf]

**Cell Reports, Volume 29**

**Supplemental Information**

**Inappropriate Intrusion of an Axonal**

**Mitochondrial Anchor into Dendrites**

**Causes Neurodegeneration**

**Dinesh C. Joshi, Chuan-Li Zhang, Lavanya Babujee, Jason D. Vevea, Benjamin K. August, Zu-Hang Sheng, Edwin R. Chapman, Timothy M. Gomez, and Shing Yan Chiu**

## Figure S1

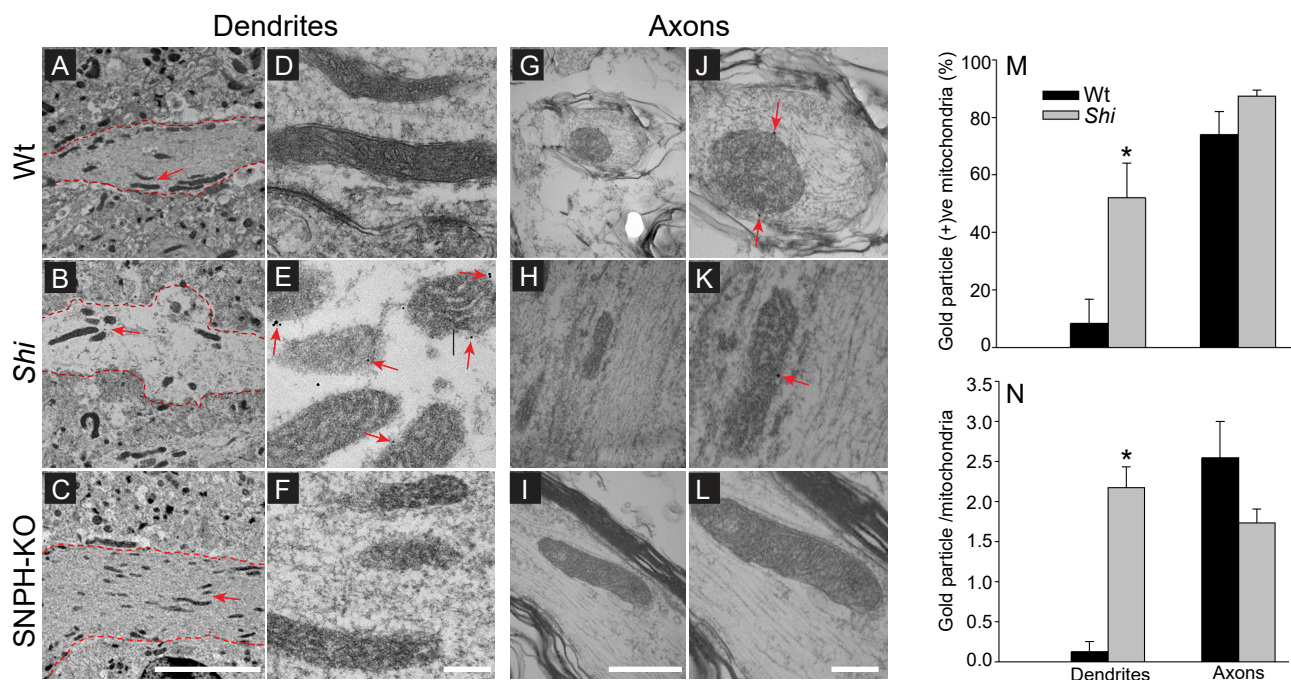

### Figure S1. SNPH immuno-EM gold particle labeling in cerebellar tissue sections.

**Related to Figure 1.** (A-C) low magnification EM imaging of SNPH labeled ultrathin sections from cerebellar molecular layers identifying dendrites (marked with dashed Red line) in age matched 3.5 month Wt, *Shi* and SNPH-KO mice. Scale bar 5  $\mu$ m. (D-F) Enlarged images of dendritic ultrastructure showing mitochondria in Wt (D), *Shi* (E) and SNPH-KO (F) cerebellum. Scale bar 200 nm. Arrows in E indicates gold particle on the mitochondrial surface in *Shi* dendrites. (G-I) EM imaging of SNPH labeled cerebellar white matter axons in Wt (G), *Shi* (H) and SNPH-KO (I) mice. Scale bar 1  $\mu$ m. Enlarged images of axonal region containing mitochondria are shown in J (Wt), K (*Shi*) and L (SNPH-KO) respectively. Scale bar 200 nm. Arrows in J and K indicate EM gold particles on mitochondria of Wt and *Shi* mice respectively. (M-N) Quantification of EM immuno gold positive mitochondria (M) and gold particle per mitochondria (N) in dendrites and axons from 8-10 different fields in 2 mice each of Wt and *Shi* mice. Data shown as mean  $\pm$  SEM. \* $p < 0.05$ .

Figure S2

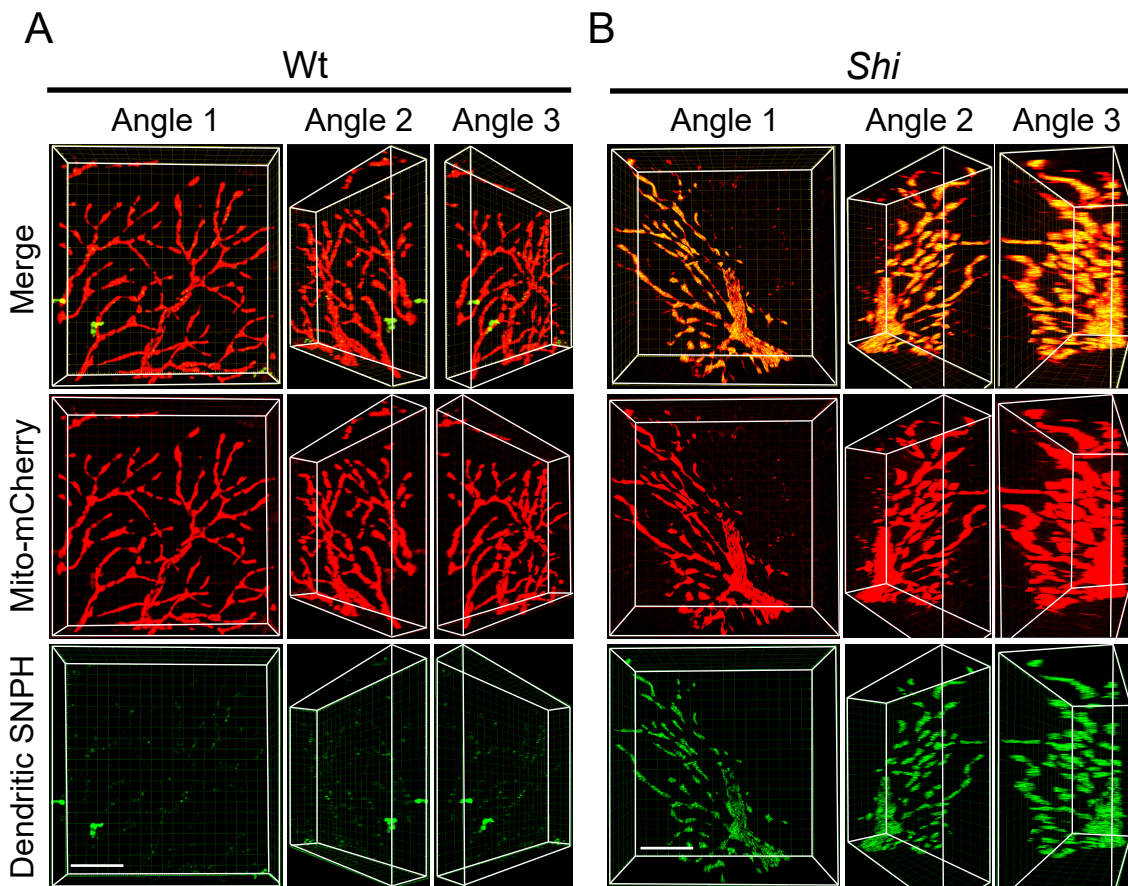

**Figure S2. Adenoviral pre-tagging of mitochondria in PC capturing SNPH intrusion.**

**Related to Figure 1.** AAV-Mito-mCherry viral particles were injected in DCN of Wt and *Shi* mice by stereotactic injection (see method for detail) and cerebellar sections were labeled with SNPH antibody after 3 weeks of viral injection. Static images from 3D rotation of Mito-mCherry and SNPH at 3 different angles in Wt and *Shi* sections are shown in panels A and B respectively. Merge of SNPH and Calbindin is shown in top panels while Mito-mCherry and SNPH are shown separately in middle and bottom panels respectively. Scale bar 5µm. Note that all SNPH labeling co-localizes (yellow) with Mito-mCherry in *Shi* (panel B) and co-rotates with Mito-mCherry (remains yellow) in all 3 angles. On the other hand the green puncta in Wt (panel A), appears to be random nonspecific dots, which does not colocalize with Mito-mCherry. Massive dendritic SNPH intrusion is captured by this method in *Shi* (bottom).

Figure S3

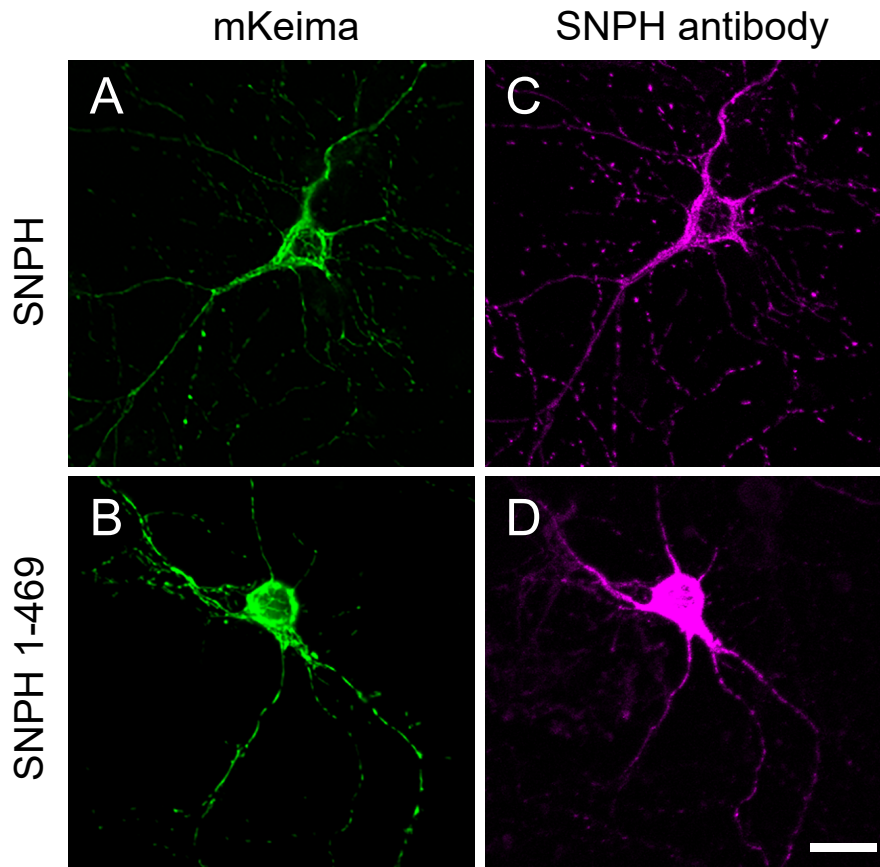

**Figure S3. Verification of non-GFP variant of SNPH and SNPH1-469 co-transfection in neurons. Related to Figure 5.** After mKeima imaging, neurons were fixed with paraformaldehyde and processed for immunofluorescence of SNPH antibody. Immunolabeling of SNPH in mKeima–SNPH (A; Ac in figure 5) and mKeima SNPH1-469 (B; Ad in figure 5) transfected neurons shown in panels C and D respectively. Scale bar 20  $\mu\text{m}$ .

Figure S4

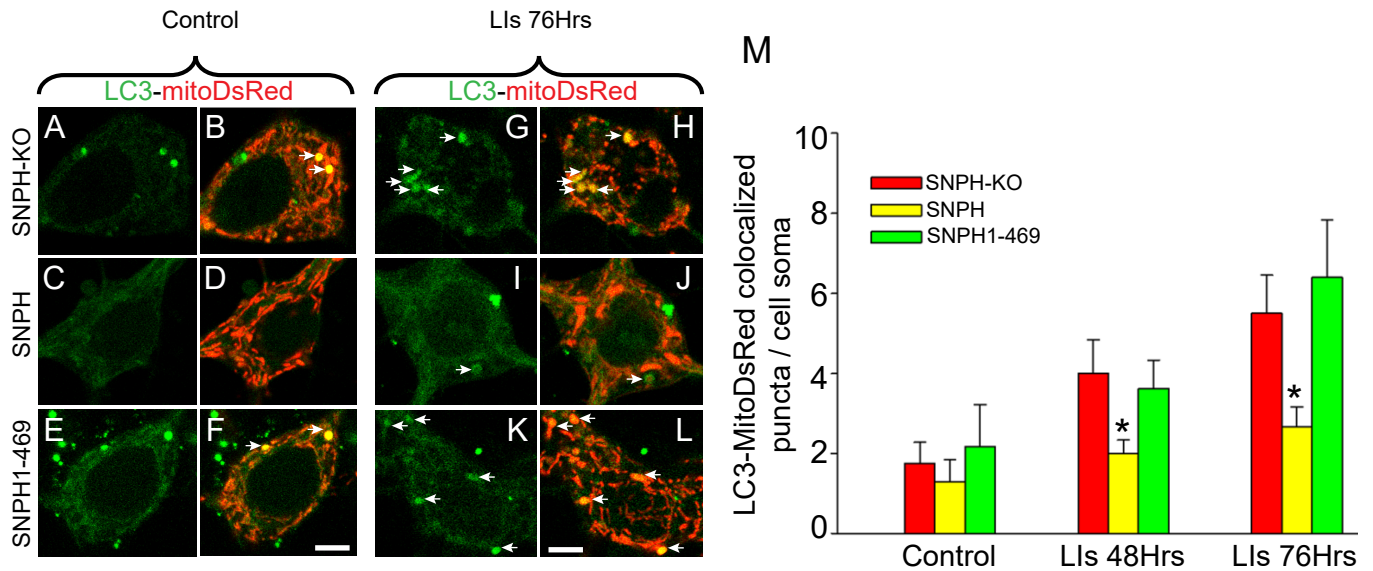

**Figure S4. SNPH overexpression blocks somal mitophagy revealed by LC3 *in vitro*.**

**Related to Figure 5.** Hippocampal neurons cultured from SNPH-KO mice were co-transfected with SNPH, SNPH1-469, LC3 and mitoDsRed plasmids and flux of somal mitophagy was monitored as co-localization of LC3-MitoDsRed puncta in neuronal soma. (A-F) Representative images of mitophagy in control (vehicle treated) culture from SNPH-KO (A-B), SNPH overexpressed (C-D) and SNPH1-469 overexpressed (E-F) neurons. Scale bar 10  $\mu$ m. Transfected neurons were treated with lysosomal inhibitors (LIs) for 48 and 76 hrs in culture medium and mitophagy flux was measured. Representative images from SNPH-KO (G-H), SNPH overexpressed (I-J) and SNPH1-469 overexpressed (K-L) groups shown at 76 hrs of LIs treatment. Scale bar 10  $\mu$ m. (M) Quantification of mitophagy in SNPH-KO, SNPH and SNPH1-469 groups in presence or absence of LIs inhibitors. Data shown as mean  $\pm$ SEM from 10 neurons from 3 different experiments in each group.

\*P<0.05

## Figure S5

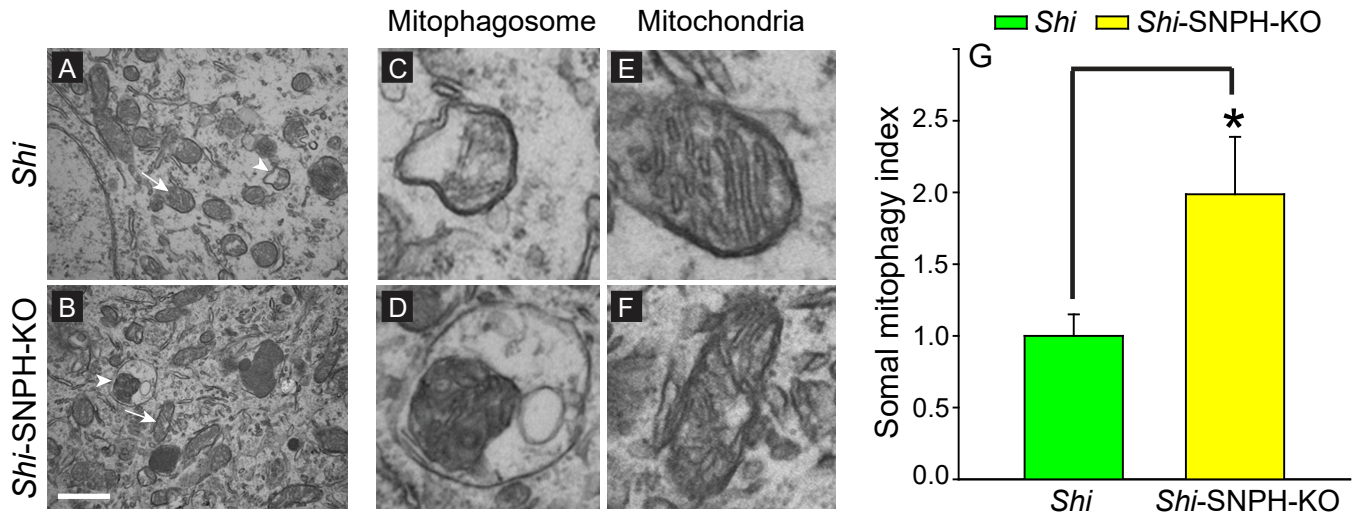

**Figure S5. SNPH-KO Increases Mitophagosomes in Soma of PC in *Shiverer* in EM analysis. Related to Figure 5.** (A – B) Low magnification EM images from cerebellar PC of *Shi* (A) and *Shi-SNPH-KO* (B) mice at 4.5 months. Arrow in A and B indicate healthy mitochondria while arrowhead in these panels indicates mitophagosomes. Scale bar 1  $\mu\text{m}$ . An enlarged image of mitophagy structures (C-D) and healthy mitochondria (E-F) shown from A and B respectively. (G) Quantification of somal mitophagy index, normalized with respect to *Shi* in total 250 cerebellar sections from 5 mice of each genotype at 4.5 months. Data shown as mean $\pm$ SEM. \*  $p < 0.05$ .
